# Supplementary material for: The soluble epoxide hydrolase gene harbors sequence variation associated with susceptibility to and protection from incident ischemic stroke
Source: Oxford University Press journal article supplement (doi:10.1093/hmg/ddi315), 2005-08-22
Supplement: ddi315_Supplementary_Data.zip [file ddi315_Supplementary_Data.zip]

Archive with 2 entries (2 files):
- ddi315supp.pdf
- ddi315_supp_fig_1.pdf
