# Supplementary material for: The soluble epoxide hydrolase gene harbors sequence variation associated with susceptibility to and protection from incident ischemic stroke
Source: Oxford University Press journal article supplement (doi:10.1093/hmg/ddi315), 2005-08-22

### Supplementary Figure 1.

DNA sequence of EPHX2 exon 14 and its intron-exon junctions. Alternative alleles of the Ala425Ala (SNP9) polymorphism are shown in bold. (A.) Common allele. (B.) Variant allele. The consensus sequence of the exon splicing enhancer (ESE) revealed by the G>A substitution of the Ala425Ala (SNP9) polymorphism is boxed. This ESE is recognized by the Ser/Arg-rich protein, SF2/ASF. The corresponding minimum fold change in SF2/ASF binding affinity predicted by computational analysis (see Ref. 32) is shown in (C.)

**A.**

cttccttcagAGTGTTTTATCCATGCATAAAGTCTGTGAAGC**G**Ggtaagagac

**B.**

cttccttcagAGTGTTTTATCCATGCATAAAGTCTGTGA**AGCA**Ggtaagagac

SF2/ASF  
binding site

**C.**

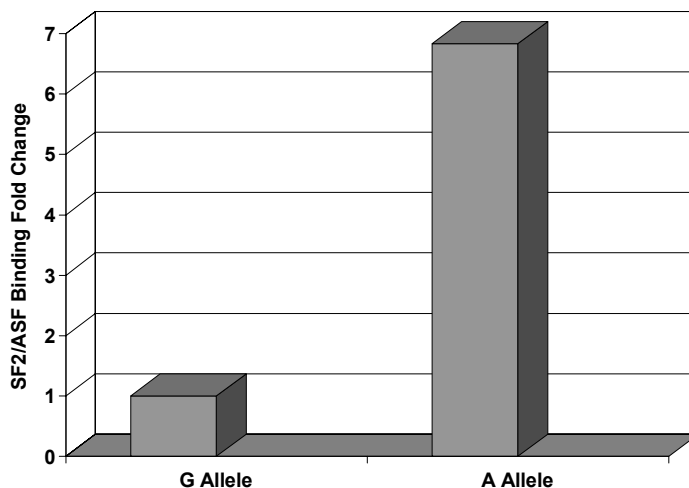

Supplement: ddi315_Supplementary_Data.zip [file ddi315_Supplementary_Data.zip › ddi315supp.pdf]
